# Supplementary material
Source: PubMed Central journal article supplement (PMC5059792)
Supplement: supp_tpc.15.01012_TPC2015-01012-RAR2_Supplemental_Data.pdf [file supp_tpc.15.01012_TPC2015-01012-RAR2_Supplemental_Data.pdf]

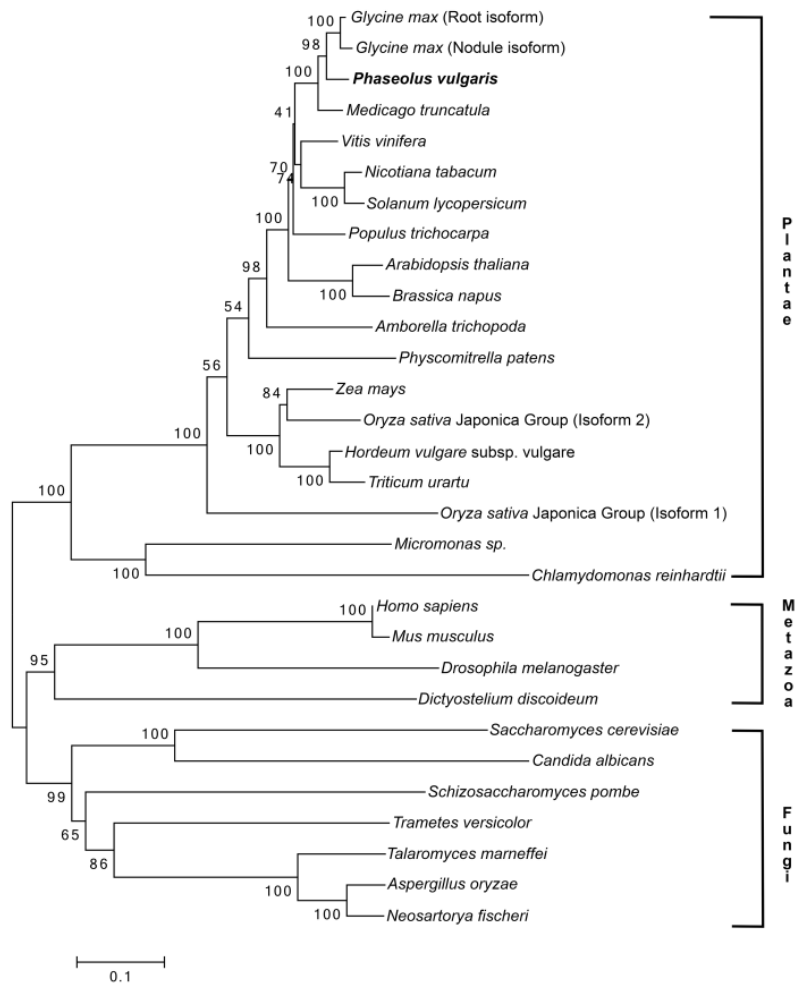

**Supplemental Figure 1. Phylogenetic tree of *PI3K* class III proteins.**

A phylogenetic tree of PI3Ks was generated from a ClustalW alignment (available as Supplemental Data Set 1) using MEGA7.0. *Phaseolus vulgaris* is in bold. Kingdoms are indicated on the right. Numbers represent bootstrap values obtained from 1000 trials (iterations). The scale on the x-axis represents the estimated branch lengths and the numbers indicate bootstrap values. Accession numbers are indicated in the Methods section.

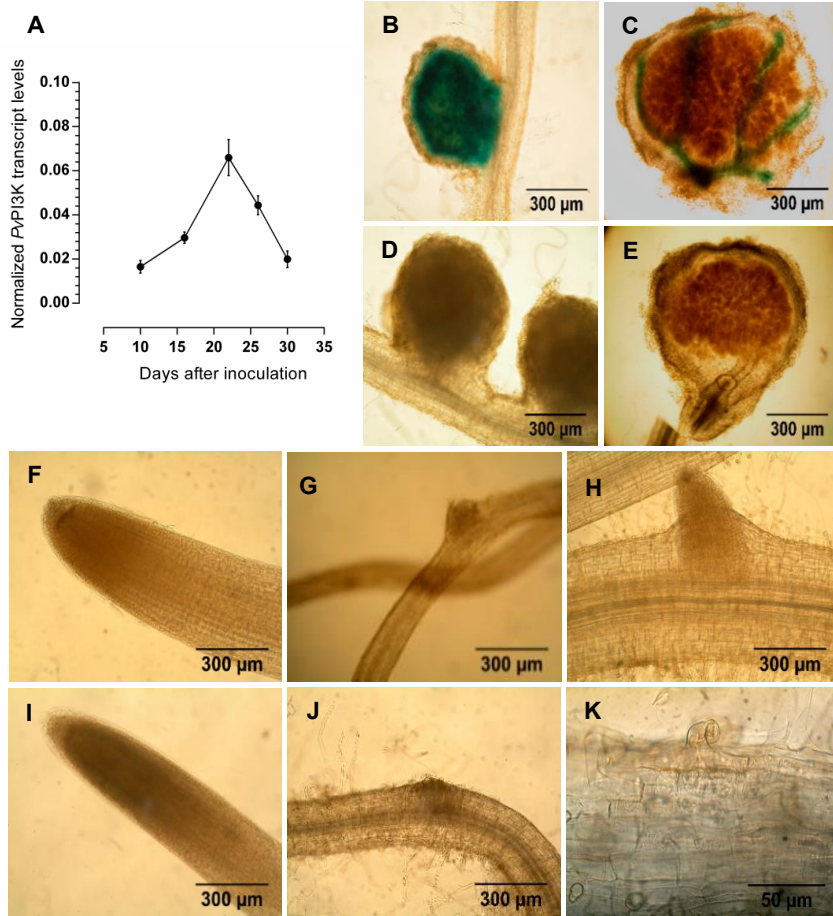

**Supplemental Figure 2. Pv-PI3K transcript levels during nodule development and tissue-specific activity of the Pv-PI3K promoter in mature and senescent nodules.**

**(A)** Pv-PI3K transcript levels increase as the wild-type *P. vulgaris* nodule reaches maturity, and then decrease as the nodule undergoes senescence. RNA was extracted from nodules harvested from roots at 10, 16, 22, 26, or 30 dai with *R. tropici* CIAT899. Transcript levels were quantified by reverse transcription and real-time PCR (RT-qPCR). Pv-PI3K transcript levels were calculated as described in Methods. Normalization calculated using levels of *Elongation Factor 1 $\alpha$*  as reference gene. Bars indicate mean  $\pm$ SD of two independent biological replicates ( $n = 2$  from pool of 10 roots). Statistical significance was confirmed by unpaired two-tailed Student's *t*-test and is indicated as \*,  $P < 0.05$ ; \*\*,  $P < 0.01$ ; or \*\*\*,  $P < 0.001$ .

**(B)** and **(C)** PvPI3K<sub>pro</sub>:GFP-GUS activity was detected in the central tissue of a 22 dai mature nodule **(B)**. In the senescent nodule, Pv-PI3K promoter activity seems to be restricted to the nodule vascular tissue **(C)**. Promoter activity was revealed by GUS staining of transgenic roots.

**(D)** to **(K)** No GUS activity was detected in nodules **(D)** and **(E)** and in transgenic roots bearing a promoter-less GFP-GUS construct as a control **(F)** to **(K)**. **(D)**, mature nodule (22 dai); **(E)**, senescent nodule (30 dai). Uninoculated transgenic roots: **(F)**, root tip; **(G)** and **(H)**, lateral root primordia. Rhizobia-inoculated roots: **(I)**, root tip; **(J)** early nodule primordium; **(K)** a higher magnification of the nodule primordium shown in **(J)**. Scale bars = 300  $\mu$ m in **(D)** to **(J)**, and 50  $\mu$ m in **(K)**.

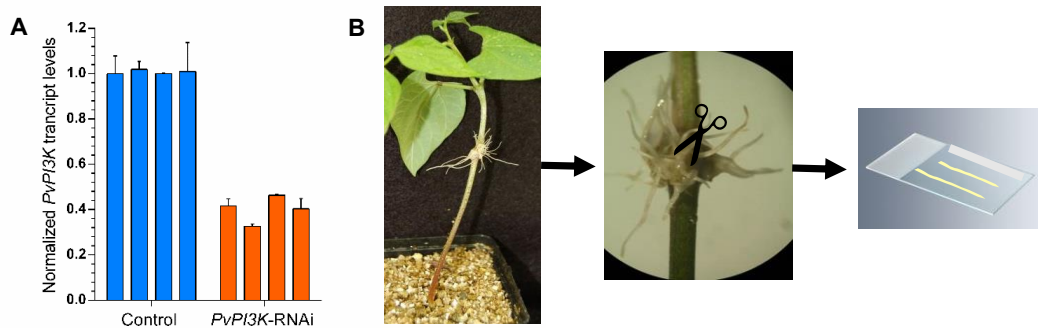

**Supplemental Figure 3. Quantification of *Pv-PI3K* transcript levels in individual *PvPI3K*-RNAi transgenic roots.**

**(A)** An approximately 60% decrease in *Pv-PI3K* transcript levels was reproducibly detected in individual *PvPI3K*-RNAi transgenic roots compared to control (TdT-Sac-RNAi) roots. Transcript levels were quantified by RT-qPCR and normalized values were calculated based on levels of *Elongation Factor 1 $\alpha$*  as reference gene. *Pv-PI3K* transcript levels were calculated as described in Methods. Each sample was assessed in triplicate and the mean was plotted as an independent bar. Error bars indicate standard deviation ( $\pm$  SD).

**(B)** Serial images showing the procedure used to mount sections (3 cm) of young transgenic roots on glass microscope slides for microscopy analysis of the root hair phenotype.

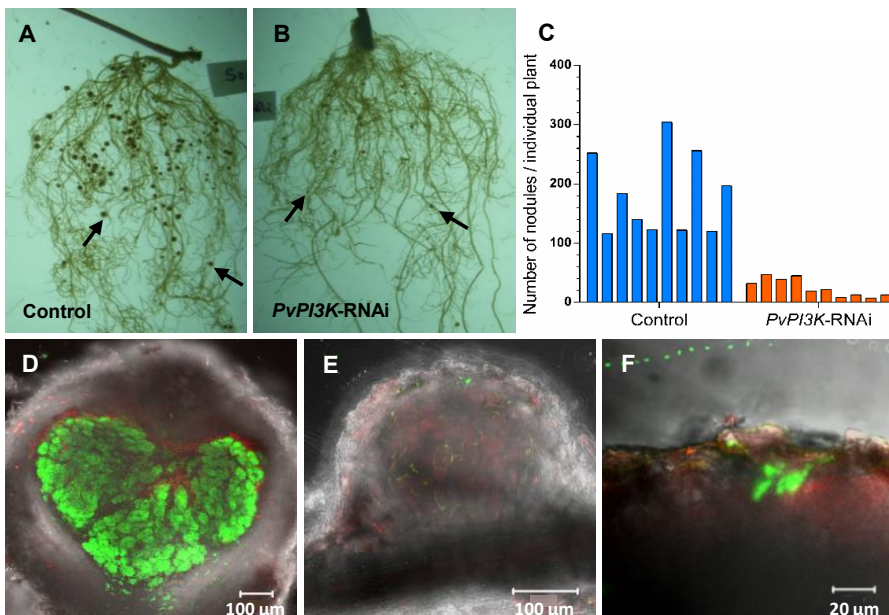

**Supplemental Figure 4. Loss-of-function of *Pv-PI3K* led to a reduction in *P. vulgaris* nodule number and impaired root nodule development.**

**(A)** Images of whole nodulated roots (22 dai) showing a decrease in the number of nodules in *PvPI3K-RNAi* transgenic roots in **(B)** with respect to control (TdT-*Sac-RNAi*) transgenic roots **(A)**. Arrows indicate representative nodules.

**(C)** Individual *PvPI3K-RNAi* transgenic roots had fewer nodules per plant ( $24.50 \pm 14.39$ ) than did control transgenic roots ( $172.40 \pm 68.50$ ) at 22 dai.  $n = 10$  roots from composite plants.

**(D)**, **(E)**, and **(F)** Representative *in vivo* images of nodules harvested at 17 dai from TdT-*Sac-RNAi* control **(D)** and *PvPI3K-RNAi* transgenic roots **(E)** and **(F)**, taken by laser scanning confocal microscopy. Nodules were harvested from transgenic roots infected with *R. tropici* CIAT899 expressing GFP and hand-sectioned to determine whether the central tissue of the nodule had infected cells (green fluorescence). **(D)** Nodule from TdT-*Sac-RNAi* control transgenic root containing infected cells. **(E)** Small nodule, representative of those observed in *PvPI3K-RNAi* transgenic roots. No infected cells were detected in the central tissue. **(F)** Higher magnification (63x) of an abortive IT in the periphery of the nodule shown in **(E)**.

Images were acquired *in vivo* using a Zeiss LSM 510 Meta Confocal Microscope; 18 optical sections each of 18.0  $\mu\text{m}$  were acquired for the control (magnification 10x) in **(D)**, whereas 12 optical sections each of 10  $\mu\text{m}$  (magnification 20x) **(E)** and 29 optical sections each of 1.0  $\mu\text{m}$  (magnification 63x) **(F)** were acquired for *PvPI3K*-RNAi transgenic roots. Scale bar = 100  $\mu\text{m}$  in **(D)** and **(E)** and 20  $\mu\text{m}$  in **(F)**.

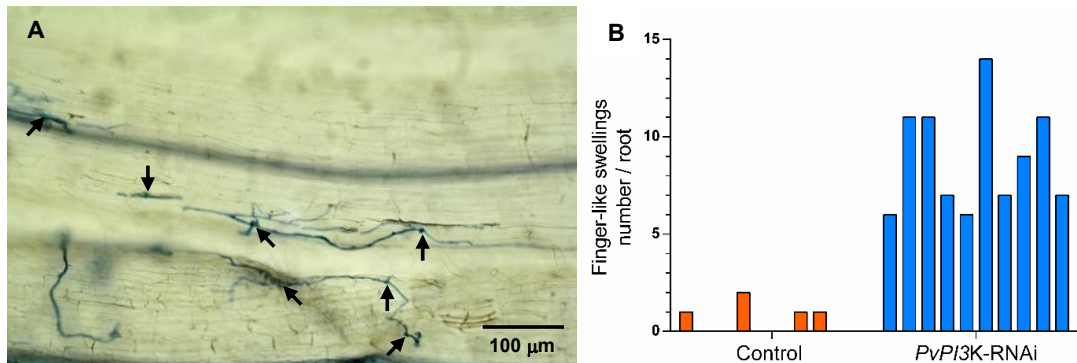

**Supplemental Figure 5. Extraradical hyphae growth and finger-like swellings are increased after *R. irregularis* inoculation in *PvPI3K* loss-of-function of *P. vulgaris* roots.**

**(A)** Image of *PvPI3K*-RNAi transgenic root infected with *R. irregularis* and stained with trypan blue, showing hyphae that failed to penetrate the root epidermis. Finger-like swellings or outgrowths are highlighted by arrows.

**(B)** Finger-like swellings are numerous in *R. irregularis*-inoculated *PvPI3K*-RNAi roots compared with control transgenic roots expressing TdT-Sac-RNAi. Quantitative analysis of finger-like swellings in individual transgenic roots ( $n = 10$ ), based on three independent experiments.

**Supplemental Table 1. Oligonucleotides used in this study**

| <b>Name</b>                        | <b>Oligonucleotide sequence (5' -- 3')</b> |
|------------------------------------|--------------------------------------------|
| <b>For quantitative PCR (qPCR)</b> |                                            |
| <i>PvPI3Kq_F</i>                   | GGC AGC TGG TGT GAA TGG AGA G              |
| <i>PvPI3Kq_R</i>                   | CAA CTG AGC TGT CAA TTC AGT CTG G          |
| <i>PvVps15q_F</i>                  | GCA AGC AAG AGA ATA CTG CCA AGA G          |
| <i>PvVps15q_R</i>                  | GCT ATG CCT CTT CTC TAG CAT CAG G          |
| <i>PvBeclin1q_F</i>                | CTG CCG CAA TCC TCT CTG CAT C              |
| <i>PvBeclin1q_R</i>                | CAC ACT GCT GGC ACC ATG AAC G              |
| <i>PvAtg8q_F</i>                   | TCC CTG CTG ACC TGA CTA TTG G              |
| <i>PvAtg8q_R</i>                   | TGT AGG AGG AAG GAC GTT GTC C              |
| <i>PvEF1<math>\alpha</math>q_F</i> | GGT CAT TGG TCA TGT CGA CTC TGG            |
| <i>PvEF1<math>\alpha</math>q_R</i> | GCA CCC AGG CAT ACT TGA ATG ACC            |
| <i>PvENOD40q_F</i>                 | AGT TTT GTT GGC AAG CAT CC                 |
| <i>PvENOD40q_R</i>                 | TAA GCA CAA GCA AAC TGT TG                 |
| <i>PvPT-4q_F</i>                   | GCG GTG ACT AAC ATG TTA GGG                |
| <i>PvPT-4q_R</i>                   | CCT GTG CCC TAG TAT TGT TGG                |
| <b>For PI3K probe</b>              |                                            |
| <i>PI3K_F</i>                      | GAA AGA GCT GAT GAT GAA GA                 |
| <i>PI3K_R</i>                      | GCA CAG CTT TTT ATA AAT GT                 |
| <b>For Gateway cloning</b>         |                                            |
| <i>PvPI3K<sub>pro</sub>_F</i>      | CAC CAT GTA TGA TAG ATA TGT TAT TGG        |
| <i>PvPI3K<sub>pro</sub>_R</i>      | GAT CAG ATC TTT GGA ACT ACT TCT TTG TAC TG |
| <i>PvPI3K-RNAi_F</i>               | CAC CAG AGC ATC GTA GCA TCAT AAG C         |
| <i>PvPI3K-RNAi_R</i>               | CCA TCT GAG GGA ATA ATG CAC TC             |
| <i>PvBeclin1-RNAi_F</i>            | CAC CAT GCA AGG GTC GTC CGT TCA TG         |
| <i>PvBeclin1-RNAi_R</i>            | CAA CCT CTT TAT CAA GTT TAT CTG AC         |
| <i>Wrky-3_F</i>                    | CTT CTC CAA CCA CAG GAA TTC ATC            |
| <i>Wrky-5_R</i>                    | GCA GAG GAG GAG AAG CTT CTA G              |



**Supplemental Table 2. Quantification of root hairs and curling in loss-of-function of *PvPI3K* and control *P. vulgaris* roots.**

|                     | Un-inoculated |                 | Root-hairs (%)       |                      |                  |
|---------------------|---------------|-----------------|----------------------|----------------------|------------------|
|                     | hairy-roots   | analyzed fields | length > 130 $\mu$ m | length < 130 $\mu$ m | bulges           |
| Control             | 16            | 234             | 33.12 $\pm$ 4.36     | 51.56 $\pm$ 3.20     | 15.37 $\pm$ 2.31 |
| <i>PvPI3K</i> -RNAi | 15            | 293             | 14.36 $\pm$ 2.60     | 56.93 $\pm$ 4.31     | 28.86 $\pm$ 4.69 |

  

|                     | Inoculated  |                 | Root-hairs (%)   |                  |
|---------------------|-------------|-----------------|------------------|------------------|
|                     | hairy-roots | analyzed fields | Non-curled       | Curled           |
| Control             | 16          | 191             | 68.70 $\pm$ 3.90 | 31.30 $\pm$ 4.20 |
| <i>PvPI3K</i> -RNAi | 15          | 293             | 96.60 $\pm$ 8.00 | 3.39 $\pm$ 1.70  |

Distribution of root hair lengths analyzed using a Zeiss Axiovert 200M microscope (Normarski optics) and counted (%) in the visual field / mm (analyzed fields) along the hairy roots. For *PvPI3K*-RNAi un-inoculated roots; root hairs > 130  $\mu$ m, ( $P < 0.001$ ); root hairs < 130  $\mu$ m, (ns, non significant) and bulges ( $P < 0.009$ ;  $n = 15$ ). For *PvPI3K*-RNAi inoculated roots; curled root hair ( $P < 0.05$ ;  $n = 15$ ). Values are mean (%)  $\pm$  SEM and statistical significance differences were determined using an unpaired two-tailed Student's *t*-test with Welch's correction.
